# Supplementary material for: Evaluation of Antibiotic Supply Decisions by Community Pharmacists in Thailand: A Vignette Study
Source: PubMed Central journal article supplement (PMC7913721; doi:10.3390/antibiotics10020154), 2021-02-03
Supplement: antibiotics-10-00154-s001.pdf [file antibiotics-10-00154-s001.pdf]

**Table S1.** Selected provinces and number of selected pharmacies in each province.

| Regions               | Population Sizes  | Provinces          | Number of Non-Accredited Pharmacies | Number of Selected Non-Accredited Pharmacies | Number of Accredited Pharmacies | Number of Selected Accredited Pharmacies | Number of Respondents (response rate) | Response Rate by Region |
|-----------------------|-------------------|--------------------|-------------------------------------|----------------------------------------------|---------------------------------|------------------------------------------|---------------------------------------|-------------------------|
| Central Thailand      | > 1,000,000       | Bangkok            | 4870                                | 205                                          | 363                             | 128                                      | 70<br>(16.8%)                         | 17.9%                   |
|                       |                   | Samut Prakan       | 524                                 | 22                                           | 40                              | 15                                       |                                       |                         |
|                       |                   | NonThaburi         | 631                                 | 27                                           | 51                              | 19                                       |                                       |                         |
|                       | 500,000–1,000,000 | Nakhon Pathom      | 311                                 | 13                                           | 19                              | 10                                       | 15<br>(25.0%)                         |                         |
|                       |                   | Chachoengsao       | 164                                 | 10                                           | 8                               | 8                                        |                                       |                         |
|                       |                   | Samut Sakhon       | 273                                 | 11                                           | 8                               | 8                                        |                                       |                         |
|                       | < 500,000         | Phetchaburi        | 13                                  | 10                                           | 6                               | 6                                        | 7<br>(18.4%)                          |                         |
|                       |                   | Nakhon Nayok       | 50                                  | 10                                           | 2                               | 2                                        |                                       |                         |
|                       |                   | Trat               | 84                                  | 10                                           | 0                               | 0                                        |                                       |                         |
| Northern Thailand     | > 1,000,000       | Chiang Mai         | 600                                 | 25                                           | 49                              | 13                                       | 19<br>(25.0%)                         | 25.2%                   |
|                       |                   | Chiang Rai         | 201                                 | 10                                           | 8                               | 8                                        |                                       |                         |
|                       |                   | Nakhon Sawan       | 138                                 | 10                                           | 10                              | 10                                       |                                       |                         |
|                       | 500,000–1,000,000 | Kamphaeng Phet     | 79                                  | 10                                           | 4                               | 4                                        | 10<br>(23.8%)                         |                         |
|                       |                   | Sukhothai          | 76                                  | 10                                           | 1                               | 1                                        |                                       |                         |
|                       |                   | Phichit            | 61                                  | 10                                           | 7                               | 7                                        |                                       |                         |
|                       | < 500,000         | Nan                | 62                                  | 10                                           | 2                               | 2                                        | 10<br>(27.0%)                         |                         |
|                       |                   | Uttaradit          | 50                                  | 10                                           | 3                               | 3                                        |                                       |                         |
|                       |                   | Uthai Thani        | 32                                  | 10                                           | 2                               | 2                                        |                                       |                         |
| Northeastern Thailand | > 1,000,000       | Nakhon Ratchasima  | 323                                 | 14                                           | 20                              | 10                                       | 15<br>(25.4%)                         | 22.4%                   |
|                       |                   | Udon Thani         | 290                                 | 12                                           | 8                               | 8                                        |                                       |                         |
|                       |                   | Surin              | 133                                 | 10                                           | 5                               | 5                                        |                                       |                         |
|                       |                   | Kalasin            | 134                                 | 10                                           | 2                               | 2                                        |                                       |                         |
|                       | 500,000–1,000,000 | Maha Sarakham      | 157                                 | 10                                           | 8                               | 8                                        | 10<br>(23.8%)                         |                         |
|                       |                   | Yasothon           | 72                                  | 10                                           | 2                               | 2                                        |                                       |                         |
|                       |                   | Bungkan            | 48                                  | 10                                           | 0                               | 0                                        |                                       |                         |
|                       | < 500,000         | Amnat Charoen      | 36                                  | 10                                           | 1                               | 1                                        | 5<br>(15.2%)                          |                         |
|                       |                   | Mukdahan           | 49                                  | 10                                           | 2                               | 2                                        |                                       |                         |
| Southern Thailand     | > 1,000,000       | Nakhon Sithammarat | 262                                 | 10                                           | 7                               | 7                                        | 20<br>(23.8%)                         | 20.5%                   |
|                       |                   | Songkhla           | 376                                 | 15                                           | 43                              | 16                                       |                                       |                         |
|                       |                   | Surat Thani        | 651                                 | 26                                           | 27                              | 10                                       |                                       |                         |
|                       | 500,000–1,000,000 | Narathiwat         | 72                                  | 10                                           | 6                               | 6                                        | 8<br>(18.2%)                          |                         |
|                       |                   | Yala               | 59                                  | 10                                           | 6                               | 6                                        |                                       |                         |
|                       |                   | Chumphon           | 86                                  | 10                                           | 2                               | 2                                        |                                       |                         |
|                       | < 500,000         | Phuket             | 705                                 | 30                                           | 35                              | 12                                       | 12<br>(17.9%)                         |                         |
|                       |                   | Satun              | 59                                  | 10                                           | 4                               | 4                                        |                                       |                         |
|                       |                   | Ranong             | 38                                  | 10                                           | 1                               | 1                                        |                                       |                         |
| <b>Missing</b>        |                   |                    |                                     |                                              |                                 |                                          | 7                                     |                         |
| <b>Total</b>          |                   |                    | 11,769                              | 652                                          | 761                             | 348                                      | 208<br>(20.8%)                        |                         |

To classify strata, firstly, community pharmacies were grouped based on their location into the four regions, which are central Thailand, Northern Thailand, North-eastern Thailand, and Southern Thailand. Secondly, community pharmacies in each regional area were divided into three groups based on the population size of the province in which the pharmacy was located. Three provinces in each of the three group size categories were randomly selected using a random number generator website,

<https://stattrek.com/statistics/random-number-generator.aspx>. This gave thirty-six provinces across four regional areas, covering three population levels.

As of May 2019, there were a small number of accredited pharmacies (The Office of Pharmacy Accreditation (Thailand) 2019), that is, 1054 out of 18,900 Type I community pharmacies (5.6%). Therefore, accredited community pharmacies in each province were selected by quota sampling in order to recruit a reasonable number of accredited pharmacies to the study (as one research question relates to comparing views of pharmacists working in accredited pharmacies versus those who did not). A ratio of approximately 1 to 2 accredited pharmacies to non-accredited pharmacies was used, resulting in approximately 350 accredited pharmacies and 650 non-accredited pharmacies in the final sample.

As there is a wide range in the number of community pharmacies in the different provinces, 35% of accredited pharmacies in each of the selected provinces were invited to participate in the study. Many provinces had few accredited pharmacies, so in cases where there were less than 10 accredited pharmacies in a selected province, all accredited pharmacies were invited. To recruit from the 650 non-accredited pharmacies, approximately 4% of non-accredited pharmacies were randomly selected, with at least 10 non-accredited pharmacies invited from each province. The list of provinces and the number of pharmacies eligible to participate in the study is shown in Table S1. From the resulting list of community pharmacies by province in each of the four regional areas, community pharmacies were randomly selected using a random number generator website, <https://stattrek.com/statistics/random-number-generator.aspx>.
